# Supplementary material for: How the Cobra Got Its Flesh-Eating Venom: Cytotoxicity as a Defensive Innovation and Its Co-Evolution with Hooding, Aposematic Marking, and Spitting
Source: PubMed Central journal article supplement (PMC5371858; doi:10.3390/toxins9030103), 2017-03-13
Supplement: toxins-09-00103-s001.pdf [file toxins-09-00103-s001.pdf]

# Supplementary Materials: How the Cobra Got Its Flesh-Eating Venom: Cytotoxicity as a Defensive Innovation and Its Co-Evolution with Hooding, Aposematic Marking, and Spitting

Nadya Panagides, Timothy N. W. Jackson, Maria P. Ikonopoulou, Kevin Arbuckle, Rudolf Pretzler, Daryl C. Yang, Syed A. Ali, Ivan Koludarov, James Dobson, Brittany Sanker, Angelique Asselin, Renan C. Santana, Iwan Hendrikx, Harald van der Ploeg, Jeremie Tai-A-Pin, Romilly van den Bergh, Harald M.I. Kerckamp, Freek J. Vonk, Arno Naude, Morné A. Strydom, Louis Jacobsz, Nathan Dunstan, Marc Jaeger, Wayne C. Hodgson, John Miles and Bryan G. Fry

Table S1. NFF venom cytotoxicity (%)  $\pm$  SEM.

| Species                  | Origin          | 5 $\mu$ g        | 1 $\mu$ g        | 0.5 $\mu$ g       | 0.1 $\mu$ g      | AUC   |
|--------------------------|-----------------|------------------|------------------|-------------------|------------------|-------|
| <i>A. lubricus</i>       | Africa          | 99.93 $\pm$ 0.07 | 39.50 $\pm$ 7.67 | 24.07 $\pm$ 2.08  | 6.26 $\pm$ 5.88  | 62.19 |
| <i>A. scutatus</i>       | Africa          | 99.46 $\pm$ 0.13 | 35.25 $\pm$ 0.75 | 0.38 $\pm$ 0.2    | 2.37 $\pm$ 2.37  | 53.24 |
| <i>B. fasciatus</i>      | Asia            | 99.16 $\pm$ 0.15 | 28.63 $\pm$ 2.42 | 25.84 $\pm$ 2.52  | 14.50 $\pm$ 6.60 | 49.99 |
| <i>D. polylepis</i>      | Africa          | 29.02 $\pm$ 3.36 | 24.48 $\pm$ 2.26 | 19.80 $\pm$ 4.30  | 10.01 $\pm$ 2.63 | 98.76 |
| <i>E. boulengeri</i>     | Asia            | 100.00           | 19.45 $\pm$ 4.22 | 14.73 $\pm$ 1.78  | 2.59 $\pm$ 1.01  | 49.83 |
| <i>E. s. longicauda</i>  | Asia            | 99.68 $\pm$ 0.12 | 12.29 $\pm$ 0.96 | 5.09 $\pm$ 1.76   | 4.66 $\pm$ 2.44  | 39.19 |
| <i>E. s. sundevalli</i>  | Asia            | 99.85 $\pm$ 0.11 | 4.15 $\pm$ 2.30  | 2.94 $\pm$ 1.88   | 5.96 $\pm$ 2.68  | 36.66 |
| <i>H. haemachatus</i>    | Africa          | 98.84 $\pm$ 0.21 | 100.00           | 100.00            | 0.00             | 134.5 |
| <i>N. annulata</i>       | Africa          | 34.95 $\pm$ 4.79 | 12.51 $\pm$ 1.79 | 13.97 $\pm$ 3.4   | 7.98 $\pm$ 2.03  | 54.45 |
| <i>N. annulifera</i>     | Africa          | 99.81 $\pm$ 0.12 | 98.90 $\pm$ 0.44 | 70.30 $\pm$ 6.42  | 0.00             | 119.7 |
| <i>N. atra</i>           | Asia            | 99.08 $\pm$ 0.13 | 97.83 $\pm$ 0.37 | 98.16 $\pm$ 0.22  | 22.71 $\pm$ 3.72 | 133.5 |
| <i>N. haje</i>           | Africa          | 99.91 $\pm$ 0.08 | 51.41 $\pm$ 9.37 | 7.58 $\pm$ 3.45   | 5.70 3.62        | 60.21 |
| <i>N. kaouthia</i>       | Asia            | 99.46 $\pm$ 0.18 | 99.96 $\pm$ 0.04 | 98.38 $\pm$ 0.74  | 0.00             | 134   |
| <i>N. melanoleuca</i>    | Africa          | 99.84 $\pm$ 0.13 | 58.33 $\pm$ 4.76 | 0.00              | 0.64 $\pm$ 0.64  | 64.38 |
| <i>N. mossambica</i>     | Africa          | 98.95 $\pm$ 0.19 | 96.57 $\pm$ 0.81 | 33.81 $\pm$ 8.54  | 0.00             | 100.8 |
| <i>N. naja</i>           | Asia (India)    | 97.92 $\pm$ 0.4  | 99.89 $\pm$ 0.11 | 98.42 $\pm$ 0.26  | 5.57 $\pm$ 0.64  | 133.4 |
| <i>N. naja</i>           | Asia (Pakistan) | 98.87 $\pm$ 0.17 | 100.00           | 99.19 $\pm$ 0.48  | 4.71 $\pm$ 2.45  | 134.1 |
| <i>N. nigricollis</i>    | Africa          | 99.03 $\pm$ 0.3  | 99.96 $\pm$ 0.3  | 92.59 $\pm$ 3.08  | 0.00             | 130.9 |
| <i>N. nivea</i>          | Africa          | 99.27 $\pm$ 0.13 | 86.53 $\pm$ 4.69 | 44.77 $\pm$ 3.13  | 4.81 $\pm$ 2.31  | 99.35 |
| <i>N. oxiana</i>         | Asia            | 100.00           | 98.50 $\pm$ 0.6  | 41.83 $\pm$ 6.72  | 5.77 $\pm$ 5.58  | 103.3 |
| <i>N. pallida</i>        | Africa          | 97.63 $\pm$ 0.25 | 98.59 $\pm$ 0.65 | 32.73 $\pm$ 10.21 | 0.00             | 101.2 |
| <i>N. philippinensis</i> | Asia            | 99.49 $\pm$ 0.13 | 90.62 $\pm$ 0.81 | 0.00              | 0.00             | 80.49 |
| <i>N. siamensis</i>      | Asia            | 99.70 $\pm$ 0.07 | 97.92 $\pm$ 0.1  | 94.09 $\pm$ 1.71  | 64.33 $\pm$ 1.09 | 124.5 |
| <i>N. sumatrana</i>      | Asia            | 99.27 $\pm$ 0.19 | 98.53 $\pm$ 0.31 | 97.72 $\pm$ 0.63  | 14.69 $\pm$ 5.26 | 133.6 |
| <i>O. hannah</i>         | Asia (Cambodia) | 100.00           | 100.00           | 99.49 $\pm$ 0.51  | 26.52 $\pm$ 2.70 | 134.6 |
| <i>O. hannah</i>         | Asia (Java)     | 99.97 $\pm$ 0.03 | 100.00           | 100.00            | 9.22 $\pm$ 4.76  | 134.9 |
| <i>O. hannah</i>         | Asia (Malaysia) | 100.00           | 100.00           | 99.9 $\pm$ 0.1    | 42.10 $\pm$ 6.3  | 134.9 |
| <i>O. hannah</i>         | Asia (Thailand) | 100.00           | 100.00           | 100.00            | 24.00 $\pm$ 1.83 | 134.9 |
| <i>W. aegyptia</i>       | Africa          | 100.00           | 98.64 $\pm$ 0.03 | 40.54 $\pm$ 9.32  | 1.45 $\pm$ 1.13  | 104.1 |

Table S2. MM96L venom cytotoxicity (%) ± SEM.

| Species                  | Origin          | 5 µg          | 1 µg         | 0.5 µg        | 0.1 µg       | AUC   |
|--------------------------|-----------------|---------------|--------------|---------------|--------------|-------|
| <i>A. lubricus</i>       | Africa          | 99.17 ± 0.44  | 33.39 ± 2.12 | 0.34 ± 0.34   | 0.00         | 51.95 |
| <i>A. scutatus</i>       | Africa          | 100.00        | 27.93 ± 2.69 | 0.07 ± 0.07   | 0.00         | 48.95 |
| <i>B. fasciatus</i>      | Asia            | 98.77 ± 0.16  | 8.54 ± 4.27  | 4.81 ± 2.44   | 0.00         | 41.71 |
| <i>D. polylepis</i>      | Africa          | 18.60 ± 3.59  | 7.06 ± 4.28  | 0.05 ± 0.05   | 0.26 ± 0.26  | 54.24 |
| <i>E. boulengeri</i>     | Asia            | 78.22 ± 6.47  | 61.74 ± 4.07 | 59.11 ± 4.79  | 15.38 ± 1.49 | 106.6 |
| <i>E. s. longicauda</i>  | Asia            | 50.53 ± 11.64 | 32.29 ± 4.10 | 21.69 ± 5.55  | 6.49 ± 1.95  | 81.5  |
| <i>E. s. sundevalli</i>  | Asia            | 67.08 ± 10.75 | 60.28 ± 3.84 | 39.56 ± 6.97  | 9.12 ± 1.66  | 105.3 |
| <i>H. haemachatus</i>    | Africa          | 99.69 ± 0.12  | 100.00       | 100.00        | 16.02 ± 3.29 | 134.8 |
| <i>N. annulata</i>       | Africa          | 6.71 ± 2.19   | 0.00         | 3.34 ± 2.36   | 1.79 ± 1.79  | 69.2  |
| <i>N. annulifera</i>     | Africa          | 100.00        | 99.94 ± 0.06 | 76.75 ± 4.88  | 0.00         | 123.3 |
| <i>N. atra</i>           | Asia            | 99.94 ± 0.03  | 99.97 ± 0.03 | 100.00        | 19.26 ± 1.15 | 134.9 |
| <i>N. haje</i>           | Africa          | 100.00        | 70.57 ± 4.09 | 6.62 ± 3.49   | 4.80 ± 1.54  | 70.45 |
| <i>N. kaouthia</i>       | Asia            | 100.00        | 100.00       | 100.00        | 3.12 ± 0.49  | 134.9 |
| <i>N. melanoleuca</i>    | Africa          | 100.00        | 89.70 ± 4.27 | 3.46 ± 1.66   | 0.00         | 81.53 |
| <i>N. mossambica</i>     | Africa          | 99.91 ± 0.08  | 100.00       | 99.65 ± 0.32  | 2.43 ± 2.43  | 134.7 |
| <i>N. naja</i>           | Asia (India)    | 99.69 ± 0.16  | 100.00       | 100.00        | 22.43 ± 3.5  | 134.8 |
| <i>N. naja</i>           | Asia (Pakistan) | 98.77 ± 0.16  | 100.00       | 100.00        | 15.59 ± 1.87 | 134.4 |
| <i>N. nigricollis</i>    | Africa          | 99.95 ± 0.05  | 100.00       | 100.00        | 31.79 ± 5.79 | 134.9 |
| <i>N. nivea</i>          | Africa          | 99.97 ± 0.03  | 80.01 ± 5.87 | 24.09 ± 11.81 | 1.04 ± 1.04  | 86.51 |
| <i>N. oxiana</i>         | Asia            | 99.95 ± 0.05  | 100.00       | 79.70 ± 7.14  | 9.37 ± 4.70  | 123.7 |
| <i>N. pallida</i>        | Africa          | 99.26 ± 0.16  | 100.00       | 94.93 ± 5.07  | 3.57 ± 2.11  | 132.1 |
| <i>N. philippinensis</i> | Asia            | 100.00        | 99.97 ± 0.03 | 29.05 ± 7.64  | 0.00         | 99.46 |
| <i>N. siamensis</i>      | Asia            | 100.00        | 100.00       | 99.98 ± 0.02  | 84.74 ± 3.17 | 134.9 |
| <i>N. sumatrana</i>      | Asia            | 99.95 ± 0.05  | 100.00       | 99.65 ± 0.35  | 3.48 ± 1.04  | 134.8 |
| <i>O. hannah</i>         | Asia (Cambodia) | 100.00        | 100.00       | 61.19 ± 8.20  | 2.38 ± 1.19  | 115.1 |
| <i>O. hannah</i>         | Asia (Java)     | 99.31 ± 0.61  | 86.12 ± 3.02 | 62.73 ± 4.46  | 18.64 ± 7.21 | 104.1 |
| <i>O. hannah</i>         | Asia (Malaysia) | 100.00        | 100.00       | 86.78 ± 7.13  | 12.18 ± 2.24 | 127.4 |
| <i>O. hannah</i>         | Asia (Thailand) | 100.00        | 95.88 ± 2.13 | 75.26 ± 6.44  | 7.75 ± 4.63  | 119.3 |
| <i>W. aegyptia</i>       | Africa          | 60.64 ± 1.75  | 7.05 ± 1.75  | 0.00          | 0.00         | 40.77 |
